# Supplementary material for: Disease response in rheumatoid arthritis across four biologic therapies associates with improvement in paraoxonase-1 activity and oxylipins
Source: PubMed Central journal article supplement — RMD Open. 2024 Oct 26;10(4):e004829. doi: 10.1136/rmdopen-2024-004829 (PMC11529732; doi:10.1136/rmdopen-2024-004829), 2024-10-26
Supplement: rmdopen-10-4-s001.pdf [file rmdopen-10-4-s001.pdf]

**Supplemental Table 1. Changes of traditional lipids, PON activity, and oxylipins from baseline to six months by treatment group.**

|                                                              | <b>TNFi</b>  | <b>RTX</b>   | <b>ABA</b>   | <b>TCZ</b>    |
|--------------------------------------------------------------|--------------|--------------|--------------|---------------|
| <b>Traditional Lipids</b>                                    | <b>N=420</b> | <b>N=112</b> | <b>N=359</b> | <b>N=284</b>  |
| <b>TC<sup>^</sup> (mg/dL)</b>                                | 1.3(1.4)     | 0.04(2.8)    | 0.5(1.5)     | 8.4(2.0)*     |
| <b>LDL<sup>^</sup> (mg/dL)</b>                               | 0.9(1.3)     | 0.3(2.4)     | -0.6(1.3)    | 6.8(1.8)*     |
| <b>HDL<sup>^</sup> (mg/dL)</b>                               | 0.8(0.6)     | 0.5(1.1)     | 0.2(0.5)     | 1.6(0.8)*     |
| <b>TG<sup>^</sup> (mg/dL)</b>                                | 2.1(3.8)     | 5.0(7.6)     | 5.4(3.4)     | 14.7(5.6)*    |
| <b>PON1 Activity</b>                                         | <b>N=379</b> | <b>N=111</b> | <b>N=330</b> | <b>N=272</b>  |
| <b>PON<sup>#</sup></b>                                       | 1.2(5.7)     | -7.5(10.2)   | 3.7(6.5)     | 30.3(8.3)*    |
| <b>LAC<sup>#</sup></b>                                       | 15.0(8.4)    | 1.5(11.7)    | -0.2(8.2)    | 41.9(9.5)*    |
| <b>ARYL<sup>#</sup></b>                                      | 10.9(7.6)    | 16.9(12.1)   | 3.9(8.8)     | 29.8(8.2)*    |
| <b>Oxylipins</b>                                             | <b>N=83</b>  | <b>N=92</b>  | <b>N=82</b>  | <b>N=92</b>   |
| <b>6k PGF1<math>\alpha</math><sup>%#</sup></b>               | 0.5(1.5)     | -2.4(1.4)    | -2.4(1.6)    | -2.4(1.4)     |
| <b>TXB2<sup>%#</sup></b>                                     | 79.7(35.7)*  | 39.7(29.2)   | 2.5(33.3)    | -14.2(29.1)   |
| <b>PGE2<sup>%#</sup></b>                                     | 13.4(11.3)   | -5.4(6.6)    | 25.5(14.7)   | -4.4(2.7)     |
| <b>LXA4<sup>%#</sup></b>                                     | 8.9(9.1)     | -2.2(7.3)    | 15.9(12.1)   | -8.9(3.8)*    |
| <b>RvD1<sup>%</sup></b>                                      | 1.9(1.1)     | 0.3(0.8)     | 1.8(1.6)     | -1.0(0.7)     |
| <b>13,14-dihydro-15k PGF2<math>\alpha</math><sup>%</sup></b> | 1.1(1.0)     | -0.07(0.9)   | 2.0(2.9)     | 1.2(0.9)      |
| <b>6trans12epi LTB4 + LTB4<sup>%#</sup></b>                  | -13.3(8.3)   | -5.8(17.9)   | 75.6(36.3)*  | -16.8(8.2)*   |
| <b>13HODE<sup>%</sup></b>                                    | 20.0(26.5)   | 9.4(20.6)    | 111.4(49.5)* | -61.1(21.1)*  |
| <b>9HODE<sup>%</sup></b>                                     | 22.0(27.3)   | 9.8(21.7)    | 121.3(50.4)* | -77.7(21.1)*  |
| <b>15HETE<sup>%</sup></b>                                    | 26.4(22.7)   | 5.8(17.2)    | 96.6(42.8)*  | -36.0(14.7)*  |
| <b>14S-HDHA<sup>%</sup></b>                                  | 23.9(24.8)   | 3.7(16.1)    | 51.1(36.2)   | -15.5(12.5)   |
| <b>(14S-HDoHE)</b>                                           |              |              |              |               |
| <b>11HETE<sup>%</sup></b>                                    | 27.6(23.4)   | 8.0(17.9)    | 103.8(43.9)* | -44.9(15.9)*  |
| <b>12HETE<sup>%</sup></b>                                    | 14.0(52.0)   | 2.4(41.1)    | -1.4(53.8)   | -64.1(42.6)   |
| <b>5HETE<sup>%</sup></b>                                     | 32.0(42.0)   | 11.8(31.5)   | 165.9(62.5)* | -101.4(36.4)* |
| <b>5-oxoETE<sup>%</sup></b>                                  | 13.5(14.7)   | -2.1(13.2)   | 68.2(29.5)*  | -26.8(8.3)*   |

Values are mean (SEM)

Values represent differences from baseline to 6 months (6 month minus baseline)

<sup>^</sup>N=1,175

<sup>#</sup>PON1 values transformed by  $\text{Log}_{10}(x)$ ; values reported as  $\text{Log}_{10}(x) * 10^3$  (N=1090-1091). Units are  $\text{Log}(U/mL)$

<sup>%</sup>oxylipin values transformed by  $\text{Log}_{10}(x+1)$ ; values reported as  $\text{Log}_{10}(x+1) * 10^3$  (N=204-350 across each oxylipin). Units are  $\text{Log}(ng/mL)$ .

<sup>#</sup>Additional missingness of data in these oxylipins with lower sample sizes compared to non-marked oxylipins. Missing data was due to technical issues with sample processing.

\*Mean change is significant different from zero by paired t-test,  $p < 0.05$
