# Supplementary material for: Disease response in rheumatoid arthritis across four biologic therapies associates with improvement in paraoxonase-1 activity and oxylipins
Source: PubMed Central journal article supplement — RMD Open. 2024 Oct 26;10(4):e004829. doi: 10.1136/rmdopen-2024-004829 (PMC11529732; doi:10.1136/rmdopen-2024-004829), 2024-10-26
Supplement: rmdopen-10-4-s003.pdf [file rmdopen-10-4-s003.pdf]

**Supplemental Table 3. Multivariable binary logistic regression analyses of the association of change in PON1 activity with individual ACR 20/50/70 treatment responses.**

| Total Cohort N=1029                                                        | ACR20              | ACR50              | ACR70              |
|----------------------------------------------------------------------------|--------------------|--------------------|--------------------|
| <b>PON<sup>#</sup></b>                                                     | 1.10 (0.98, 1.22)  | 1.16 (1.02, 1.32)* | 1.14 (0.96, 1.35)  |
| <b>LAC<sup>#</sup></b>                                                     | 1.13 (1.04, 1.23)* | 1.12 (1.02, 1.23)* | 1.15 (1.01, 1.30)* |
| <b>ARYL<sup>#</sup></b>                                                    | 1.13 (1.04, 1.24)* | 1.09 (0.98, 1.21)  | 1.21 (1.05, 1.39)* |
| <b>Adjusted Model (Additionally Controlling for Percent Change in HDL)</b> |                    |                    |                    |
| <b>PON<sup>#</sup></b>                                                     | 1.06 (0.95, 1.18)  | 1.14 (1.00, 1.29)  | 1.13 (0.95, 1.34)  |
| <b>LAC<sup>#</sup></b>                                                     | 1.11 (1.02, 1.21)* | 1.10 (1.00, 1.21)  | 1.13 (1.00, 1.29)  |
| <b>ARYL<sup>#</sup></b>                                                    | 1.11 (1.02, 1.22)* | 1.07 (0.97, 1.19)  | 1.20 (1.04, 1.38)* |

\*p<0.05

Values are OR (95% CI).

Model adjusted for BMI, RA disease duration, seropositivity. Interaction terms for PON1 activity and drug group were not significant for ACR 20, 50, or 70 (all P>0.1)

<sup>#</sup>X (X=PON, LAC, ARYL) values are difference in log<sub>10</sub>X from 0 to 6 months. Units are Log(U/mL).

PON=paraoxonase; LAC=lactonase; ARYL=arylesterase; TNFi=tumor necrosis factor inhibitor;

RTX=rituximab; ABA=abatacept; TCZ=tocilizumab
