# Supplementary material for: Disease response in rheumatoid arthritis across four biologic therapies associates with improvement in paraoxonase-1 activity and oxylipins
Source: PubMed Central journal article supplement — RMD Open. 2024 Oct 26;10(4):e004829. doi: 10.1136/rmdopen-2024-004829 (PMC11529732; doi:10.1136/rmdopen-2024-004829), 2024-10-26
Supplement: rmdopen-10-4-s004.pdf [file rmdopen-10-4-s004.pdf]

**Supplemental Figure 2. Multivariable binary logistic regression analysis of the association between changes in PON1 activity from baseline to 6 months and individual ACR20/50/70 responses.**

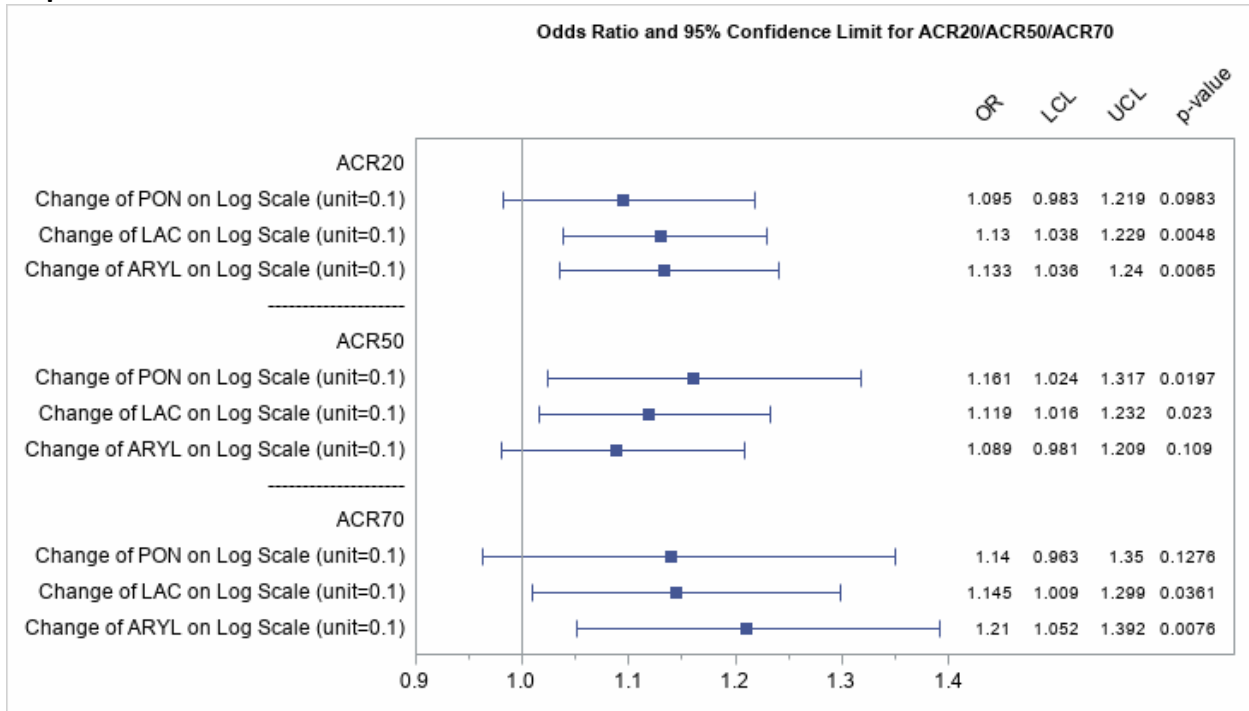

Model is a binary logistic regression for the effect of changes in PON1 activity on individual ACR 20/50/70 responses adjusted for BMI, seropositivity, and disease duration. PON1 values are difference in  $\log_{10}X$  from 0 to 6 months. Units are  $\text{Log}(U/mL)$ . PON1=paraoxonase; LAC=lactonase; ARYL=arylesterase; BMI=body mass index; TNFi=tumor necrosis factor inhibitor; TCZ=tocilizumab; ABA=abatacept; RTX=rituximab; OR=odds ratio; LCL=lower confidence interval (5%); UCL=upper confidence interval (95%)
