# Supplementary material for: Disease response in rheumatoid arthritis across four biologic therapies associates with improvement in paraoxonase-1 activity and oxylipins
Source: PubMed Central journal article supplement — RMD Open. 2024 Oct 26;10(4):e004829. doi: 10.1136/rmdopen-2024-004829 (PMC11529732; doi:10.1136/rmdopen-2024-004829), 2024-10-26
Supplement: rmdopen-10-4-s005.pdf [file rmdopen-10-4-s005.pdf]

**Supplemental Table 4. Multivariable linear regression analysis of associations of change in PON1 with change in DAS28-CRP, and CDAI after 6 months of biologic therapy, controlling for percent change in HDL.**

|                                                                       | Total Cohort  | TNFi          | RTX            | ABA            | TCZ          |
|-----------------------------------------------------------------------|---------------|---------------|----------------|----------------|--------------|
| <b>Change in DAS28-CRP- Adjusted Model (<math>\Delta\%</math>HDL)</b> |               |               |                |                |              |
| <b>PON<sup>#</sup></b>                                                | -0.83 (0.35)* | -1.18 (0.62)  | -1.37 (1.22)   | -0.99 (0.64)   | -0.14 (0.64) |
| <b>LAC<sup>#</sup></b>                                                | -0.66 (0.27)* | -0.52 (0.42)  | 0.70 (0.97)    | -1.28 (0.49)*  | -0.63 (0.56) |
| <b>ARYL<sup>#</sup></b>                                               | -0.79 (0.28)* | -0.87 (0.47)  | -0.67 (0.95)   | -0.96 (0.47)*  | -0.50 (0.65) |
| <b>Change in CDAI- Adjusted Model (<math>\Delta\%</math>HDL)</b>      |               |               |                |                |              |
| <b>PON<sup>#</sup></b>                                                | -6.22 (3.57)  | -11.00 (6.56) | -10.04 (12.53) | -8.74 (6.46)   | 1.44 (6.43)  |
| <b>LAC<sup>#</sup></b>                                                | -4.91 (2.76)  | -3.67 (4.45)  | 3.14 (9.99)    | -13.61 (4.98)* | 0.64 (5.81)  |
| <b>ARYL<sup>#</sup></b>                                               | -6.02 (2.93)* | -5.67 (4.94)  | -9.81 (9.71)   | -9.53 (4.80)*  | -0.26 (6.71) |

Values are model coefficient estimate (SE).

General linear models with differences of DAS28-CRP and CDAI from 0 to 6 months as the dependent variable, controlling for seropositivity, RA disease duration, BMI, and percent change in HDL from baseline to 6 months.

PON1 values are difference in  $\log_{10}X$  from 0 to 6 months. Units are Log(U/mL).

\*p<0.05

PON=paraoxonase; LAC=lactonase; ARYL=arylesterase; BMI=body mass index ( $\text{kg}/\text{m}^2$ ); seropositive=+RF or CCP; TNFi=tumor necrosis factor inhibitor; RTX=rituximab; ABA=abatacept; TCZ=tocilizumab.
