# Supplementary material for: Disease response in rheumatoid arthritis across four biologic therapies associates with improvement in paraoxonase-1 activity and oxylipins
Source: PubMed Central journal article supplement — RMD Open. 2024 Oct 26;10(4):e004829. doi: 10.1136/rmdopen-2024-004829 (PMC11529732; doi:10.1136/rmdopen-2024-004829), 2024-10-26
Supplement: rmdopen-10-4-s006.pdf [file rmdopen-10-4-s006.pdf]

**Supplemental Table 5. Change in oxylipins in the TNFi group from baseline to 6 months in DAS28 low versus high responders.**

|                                                   | DAS28 Response in TNFi |             |          |             | p-value |
|---------------------------------------------------|------------------------|-------------|----------|-------------|---------|
|                                                   | N (Low)                | Low         | N (High) | High        |         |
| <b>6k PGF1<math>\alpha</math>%</b>                | 26                     | 0.9(2.3)    | 23       | -0.01(2.0)  | 0.76    |
| <b>TXB2%</b>                                      | 35                     | 92.3(46.5)  | 38       | 68.2(54.1)  | 0.74    |
| <b>PGE2%</b>                                      | 29                     | 22.5(21.4)  | 28       | 3.9(6.1)    | 0.41    |
| <b>LXA4%</b>                                      | 28                     | 18.7(18.7)  | 30       | -0.2(2.3)   | 0.33    |
| <b>RvD1%</b>                                      | 40                     | 2.0(2.1)    | 43       | 1.7(1.0)    | 0.89    |
| <b>(N=82-93)</b>                                  |                        |             |          |             |         |
| <b>13,14-dihydro-15k PGF2<math>\alpha</math>%</b> | 40                     | 1.2(1.8)    | 43       | 1.0(1.1)    | 0.93    |
| <b>6trans12epi LTB4 + LTB4%</b>                   | 33                     | -18.3(16.5) | 33       | -8.4(2.4)   | 0.56    |
| <b>13HODE%</b>                                    | 40                     | 55.1(50.0)  | 43       | -13.2(21.8) | 0.21    |
| <b>9HODE%</b>                                     | 40                     | 57.3(50.0)  | 43       | -10.9(24.5) | 0.23    |
| <b>15HETE%</b>                                    | 40                     | 52.1(44.5)  | 43       | 2.4(14.4)   | 0.29    |
| <b>14S-HDHA% (14S-HDoHE)</b>                      | 40                     | 53.5(46.4)  | 42       | -4.2(19.7)  | 0.26    |
| <b>11HETE%</b>                                    | 40                     | 56.3(45.0)  | 43       | 0.8(16.6)   | 0.25    |
| <b>12HETE%</b>                                    | 40                     | 92.2(79.5)  | 43       | -57.7(66.8) | 0.15    |
| <b>5HETE%</b>                                     | 40                     | 89.5 (74.0) | 43       | -21.4(42.1) | 0.20    |
| <b>5-oxoETE%</b>                                  | 40                     | 44.2(27.9)  | 43       | -15.1(10.1) | 0.05    |

DAS28-CRP high-responder defined as the 50 samples with the greatest decrease in DAS28-CRP, versus low responders with the least decrease.

Oxylipin values are changes from baseline to 6 months (6 month minus baseline)

\*p<0.05 between means

Values are Mean(SEM)

%Values represented as  $\text{Log}_{10}(x+1) \cdot 10^3$

Additional missingness of data in some oxylipins (6k PGF1 $\alpha$ , TXB2, PGE2, LXA4, 6trans12epi LTB4 + LTB4).
