# Supplementary material for: Disease response in rheumatoid arthritis across four biologic therapies associates with improvement in paraoxonase-1 activity and oxylipins
Source: PubMed Central journal article supplement — RMD Open. 2024 Oct 26;10(4):e004829. doi: 10.1136/rmdopen-2024-004829 (PMC11529732; doi:10.1136/rmdopen-2024-004829), 2024-10-26
Supplement: rmdopen-10-4-s007.pdf [file rmdopen-10-4-s007.pdf]

**Supplemental Table 6. Change in oxylipins in the RTX group from baseline to 6 months in DAS28 low versus high responders.**

|                                                   | DAS28 Response in RTX |             |          |              | p-value |
|---------------------------------------------------|-----------------------|-------------|----------|--------------|---------|
|                                                   | N (Low)               | Low         | N (High) | High         |         |
| <b>6k PGF1<math>\alpha</math>%</b>                | 28                    | -0.5(2.6)   | 25       | -4.9(2.6)    | 0.15    |
| <b>TXB2%</b>                                      | 41                    | 98.9(38.0)  | 44       | -16.2(43.5)  | 0.05*   |
| <b>PGE2%</b>                                      | 32                    | -11.4(13.6) | 34       | 0.2(2.0)     | 0.41    |
| <b>LXA4%</b>                                      | 29                    | -11.1(14.6) | 31       | 2.8(2.8)     | 0.35    |
| <b>RvD1%</b>                                      | 46                    | 0.1(1.1)    | 46       | 0.2(1.1)     | 0.93    |
| <b>(N=82-93)</b>                                  |                       |             |          |              |         |
| <b>13,14-dihydro-15k PGF2<math>\alpha</math>%</b> | 46                    | 1.0(1.4)    | 46       | -1.1(1.1)    | 0.24    |
| <b>6trans12epi LTB4 + LTB4%</b>                   | 34                    | -24.9(36.8) | 36       | 8.9(5.3)     | 0.37    |
| <b>13HODE%</b>                                    | 46                    | -5.2(34.9)  | 46       | 15.4(21.1)   | 0.61    |
| <b>9HODE%</b>                                     | 46                    | -13.0(37.7) | 46       | 23.1(20.3)   | 0.40    |
| <b>15HETE%</b>                                    | 46                    | -5.8(27.8)  | 46       | 4.0(16.3)    | 0.76    |
| <b>14S-HDHA% (14S-HDoHE)</b>                      | 45                    | 11.5(21.5)  | 45       | -13.5(22.7)  | 0.42    |
| <b>11HETE%</b>                                    | 46                    | -6.6(30.0)  | 46       | 8.7(15.0)    | 0.65    |
| <b>12HETE%</b>                                    | 46                    | 106.3(51.2) | 46       | -114.2(60.4) | 0.007*  |
| <b>5HETE%</b>                                     | 46                    | -26.9(45.6) | 46       | 29.3(38.8)   | 0.35    |
| <b>5-oxoETE%</b>                                  | 46                    | -17.9(24.3) | 46       | 14.6(10.7)   | 0.23    |

DAS28-CRP high-responder defined as the 50 samples with the greatest decrease in DAS28-CRP, versus low responders with the least decrease.

Oxylipin values are changes from baseline to 6 months (6 month minus baseline)

\*p<0.05 between means

Values are Mean(SEM)

%Values represented as  $\text{Log}_{10}(x+1) \cdot 10^3$

Additional missingness of data in some oxylipins (6k PGF1 $\alpha$ , TXB2, PGE2, LXA4, 6trans12epi LTB4 + LTB4).
