# Supplementary material for: Disease response in rheumatoid arthritis across four biologic therapies associates with improvement in paraoxonase-1 activity and oxylipins
Source: PubMed Central journal article supplement — RMD Open. 2024 Oct 26;10(4):e004829. doi: 10.1136/rmdopen-2024-004829 (PMC11529732; doi:10.1136/rmdopen-2024-004829), 2024-10-26
Supplement: rmdopen-10-4-s008.pdf [file rmdopen-10-4-s008.pdf]

**Supplemental Table 8. Change in oxylipins in the TCZ group from baseline to 6 months in DAS28 low versus high responders.**

|                                                   | DAS28 Response in TCZ |             |          |              | p-value |
|---------------------------------------------------|-----------------------|-------------|----------|--------------|---------|
|                                                   | N (Low)               | Low         | N (High) | High         |         |
| <b>6k PGF1<math>\alpha</math>%</b>                | 26                    | -1.9(1.9)   | 22       | -3.1(2.1)    | 0.67    |
| <b>TXB2%</b>                                      | 39                    | 30.4(53.6)  | 45       | -52.8(27.4)  | 0.17    |
| <b>PGE2%</b>                                      | 30                    | 0.0(3.3)    | 27       | -9.3(4.1)    | 0.08    |
| <b>LXA4%</b>                                      | 28                    | -5.4(2.7)   | 27       | -12.5(7.2)   | 0.36    |
| <b>RvD1%</b>                                      | 43                    | -0.7(1.0)   | 49       | -1.2(1.0)    | 0.71    |
| <b>(N=82-93)</b>                                  |                       |             |          |              |         |
| <b>13,14-dihydro-15k PGF2<math>\alpha</math>%</b> | 43                    | 2.1(1.4)    | 49       | 0.4(1.2)     | 0.38    |
| <b>6trans12epi LTB4 + LTB4%</b>                   | 34                    | -7.1(7.5)   | 34       | -26.5(14.5)  | 0.24    |
| <b>13HODE%</b>                                    | 43                    | -70.6(25.9) | 49       | -52.8(32.7)  | 0.67    |
| <b>9HODE%</b>                                     | 43                    | -92.3(26.2) | 49       | -64.8(32.3)  | 0.51    |
| <b>15HETE%</b>                                    | 43                    | -14.1(15.8) | 49       | -55.3(23.6)  | 0.15    |
| <b>14S-HDHA% (14S-HDoHE)</b>                      | 42                    | 11.6(16.0)  | 48       | -39.2(18.3)  | 0.04*   |
| <b>11HETE%</b>                                    | 43                    | -23.6(19.1) | 49       | -63.5(24.6)  | 0.20    |
| <b>12HETE%</b>                                    | 43                    | 22.6(56.8)  | 49       | -140.1(61.0) | 0.054   |
| <b>5HETE%</b>                                     | 43                    | -68.6(49.1) | 49       | -130.2(53.3) | 0.40    |
| <b>5-oxoETE%</b>                                  | 43                    | -18.6(11.0) | 49       | -34.0(12.2)  | 0.35    |

DAS28-CRP high-responder defined as the 50 samples with the greatest decrease in DAS28-CRP, versus low responders with the least decrease.

Oxylipin values are changes from baseline to 6 months (6 month minus baseline)

\*p<0.05 between means

Values are Mean(SEM)

%Values represented as  $\text{Log}_{10}(x+1) \cdot 10^3$

Additional missingness of data in some oxylipins (6k PGF1 $\alpha$ , TXB2, PGE2, LXA4, 6trans12epi LTB4 + LTB4).
