# Supplementary material for: Disease response in rheumatoid arthritis across four biologic therapies associates with improvement in paraoxonase-1 activity and oxylipins
Source: PubMed Central journal article supplement — RMD Open. 2024 Oct 26;10(4):e004829. doi: 10.1136/rmdopen-2024-004829 (PMC11529732; doi:10.1136/rmdopen-2024-004829), 2024-10-26
Supplement: rmdopen-10-4-s009.pdf [file rmdopen-10-4-s009.pdf]

**Supplemental Table 9. Univariate and multivariate linear regression analyses of the association between change in oxylipins and change in DAS28CRP after six months of biologic therapy.**

| <b>Univariate Linear Regression</b>          |                     |
|----------------------------------------------|---------------------|
|                                              | <b>Total Cohort</b> |
| <b>6k PGF1<math>\alpha</math>% (N=48-54)</b> | -8.4 (12.9)         |
| <b>TXB2% (N=72-86)</b>                       | 0.9 (0.4)*          |
| <b>PGE2% (N=57-66)</b>                       | -1.7 (1.6)          |
| <b>LXA4% (N=50-61)</b>                       | -1.0 (2.1)          |
| <b>RvD1% (N=82-93)</b>                       | 2.4 (10.2)          |
| <b>13,14-dihydro-15k</b>                     | -6.7 (7.0)          |
| <b>PGF2<math>\alpha</math>% (N=82-93)</b>    |                     |
| <b>6trans12epi LTB4 +</b>                    | -0.3 (0.7)          |
| <b>LTB4% (N=65-71)</b>                       |                     |
| <b>13HODE% (N=82-93)</b>                     | 0.0 (0.3)           |
| <b>9HODE% (N=82-93)</b>                      | -0.1 (0.3)          |
| <b>15HETE% (N=82-93)</b>                     | 0.3 (0.4)           |
| <b>14S-HDHA% (14S-</b>                       | 0.9 (0.5)           |
| <b>HDoHE) (N=82-91)</b>                      |                     |
| <b>11HETE% (N=82-93)</b>                     | 0.3 (0.4)           |
| <b>12HETE% (N=82-93)</b>                     | 0.9 (0.2)*          |
| <b>5HETE% (N=82-93)</b>                      | 0.1 (0.2)           |
| <b>5-oxoETE% (N=82-93)</b>                   | 0.4 (0.6)           |
| <b>Multivariate Linear Regression</b>        |                     |
|                                              | <b>Total Cohort</b> |
| <b>TXB2%</b>                                 | 0.05 (0.04)         |
| <b>BMI</b>                                   | 0.05 (0.01)*        |
| <b>Seropositive</b>                          | -0.0006 (0.12)      |
| <b>12HETE%</b>                               | 0.82 (0.22)*        |
| <b>BMI</b>                                   | 0.05 (0.01)*        |
| <b>Seropositive</b>                          | 0.05 (0.11)         |

\*p<0.05

Values are model coefficient estimate (SE)

%Values represented as  $\text{Log}_{10}(x+1) \times 10^3$ , and represent change over 6 months.
