# Supplementary material for: Disease response in rheumatoid arthritis across four biologic therapies associates with improvement in paraoxonase-1 activity and oxylipins
Source: PubMed Central journal article supplement — RMD Open. 2024 Oct 26;10(4):e004829. doi: 10.1136/rmdopen-2024-004829 (PMC11529732; doi:10.1136/rmdopen-2024-004829), 2024-10-26
Supplement: rmdopen-10-4-s010.pdf [file rmdopen-10-4-s010.pdf]

**Supplemental Table 2. Multivariable ordinal logistic regression analysis of associations of change in PON1 with ACR-Max response adjusted for percent change in HDL.**

|                         | Total Cohort                                           | TNFi (N=359)       | RTX (N=102)       | ABA (N=313)        | TCZ (N=255)        |
|-------------------------|--------------------------------------------------------|--------------------|-------------------|--------------------|--------------------|
|                         | Adjusted Model (Controlling for Percent Change in HDL) |                    |                   |                    |                    |
| <b>PON<sup>#</sup></b>  | 1.07 (0.97, 1.19)                                      | 1.13 (0.95, 1.35)  | 0.80 (0.53, 1.20) | 1.13 (0.92, 1.37)  | 1.03, (0.85, 1.24) |
| <b>LAC<sup>#</sup></b>  | 1.10 (1.02, 1.19)*                                     | 1.14 (1.01, 1.29)* | 0.88 (0.63, 1.24) | 1.18 (1.00, 1.40)* | 1.04 (0.88, 1.22)  |
| <b>ARYL<sup>#</sup></b> | 1.11 (1.02, 1.21)*                                     | 1.14 (1.00, 1.31)* | 0.76 (0.53, 1.10) | 1.21 (1.03, 1.43)* | 1.05 (0.87, 1.28)  |

Values are OR (95% CI).

\*p<0.05

Model is an ordinal logistic regression for the effect of change in PON1 activity on a composite ACR 20/50/70 response (0=non-responder, 1=ACR20 responder, 2=ACR50 responder, 3=ACR70 responder) adjusted for BMI, seropositivity, disease duration, percent change in HDL from baseline to six months.

<sup>#</sup>PON1 values are difference in log<sub>10</sub>X from 0 to 6 months. Units are Log(U/mL).

PON1=paraoxonase; LAC=lactonase; ARYL=arylesterase; BMI=body mass index; TNFi=tumor necrosis factor inhibitor; TCZ=tocilizumab; ABA=abatacept; RTX=rituximab; OR=odds ratio; LCL=lower confidence interval (5%); UCL=upper confidence interval (95%)
