# Supplementary material for: Disease response in rheumatoid arthritis across four biologic therapies associates with improvement in paraoxonase-1 activity and oxylipins
Source: PubMed Central journal article supplement — RMD Open. 2024 Oct 26;10(4):e004829. doi: 10.1136/rmdopen-2024-004829 (PMC11529732; doi:10.1136/rmdopen-2024-004829), 2024-10-26
Supplement: rmdopen-10-4-s011.pdf [file rmdopen-10-4-s011.pdf]

**Supplemental Table 7. Change in oxylipins in the ABA group from baseline to 6 months in DAS28 low versus high responders.**

|                                                   | DAS28 Response in ABA |             |          |             | p-value |
|---------------------------------------------------|-----------------------|-------------|----------|-------------|---------|
|                                                   | N (Low)               | Low         | N (High) | High        |         |
| <b>6k PGF1<math>\alpha</math>%</b>                | 22                    | -5.4(2.5)   | 31       | -0.3(2.0)   | 0.11    |
| <b>TXB2%</b>                                      | 33                    | 0.2(61.3)   | 39       | 4.4(33.7)   | 0.95    |
| <b>PGE2%</b>                                      | 27                    | -1.7(4.3)   | 32       | 48.4(26.5)  | 0.07    |
| <b>LXA4%</b>                                      | 22                    | 1.7(3.8)    | 28       | 27.0(21.3)  | 0.25    |
| <b>RvD1%</b>                                      | 38                    | 1.6(2.6)    | 44       | 1.9(2.1)    | 0.93    |
| <b>(N=82-93)</b>                                  |                       |             |          |             |         |
| <b>13,14-dihydro-15k PGF2<math>\alpha</math>%</b> | 38                    | -2.6(1.5)   | 44       | 5.9(5.2)    | 0.12    |
| <b>6trans12epi LTB4 + LTB4%</b>                   | 28                    | 47.5(49.6)  | 37       | 96.8(51.8)  | 0.49    |
| <b>13HODE%</b>                                    | 38                    | 75.5(57.8)  | 44       | 142.3(78.0) | 0.49    |
| <b>9HODE%</b>                                     | 38                    | 78.4(59.9)  | 44       | 158.3(78.6) | 0.42    |
| <b>15HETE%</b>                                    | 38                    | 70.1(57.2)  | 44       | 119.4(63.1) | 0.56    |
| <b>14S-HDHA% (14S-HDoHE)</b>                      | 38                    | 57.6(53.3)  | 44       | 45.5(50.0)  | 0.87    |
| <b>11HETE%</b>                                    | 38                    | 74.2(58.3)  | 44       | 129.4(64.9) | 0.53    |
| <b>12HETE%</b>                                    | 38                    | 55.1(82.7)  | 44       | -50.2(70.5) | 0.34    |
| <b>5HETE%</b>                                     | 38                    | 126.8(79.4) | 44       | 199.7(94.7) | 0.56    |
| <b>5-oxoETE%</b>                                  | 38                    | 57.5(44.8)  | 44       | 77.5(39.4)  | 0.74    |

DAS28-CRP high-responder defined as the 50 samples with the greatest decrease in DAS28-CRP, versus low responders with the least decrease.

Oxylipin values are changes from baseline to 6 months (6 month minus baseline)

\*p<0.05 between means

Values are Mean(SEM)

%Values represented as  $\text{Log}_{10}(x+1) \cdot 10^3$

Additional missingness of data in some oxylipins (6k PGF1 $\alpha$ , TXB2, PGE2, LXA4, 6trans12epi LTB4 + LTB4).
